# Supplementary material for: Gold nanoparticles as an outstanding catalyst for the hydrogen evolution reaction
Source: Royal Society of Chemistry journal article supplement (doi:10.1039/c8cc00038g), 2018-01-01
Supplement: c8cc00038g1.pdf [file c8cc00038g1.pdf]

## Supporting information

### Gold nanoparticle as an outstanding catalyst for the hydrogen evolution reaction

Tien D. Tran,<sup>a</sup> Mai T.T. Nguyen,<sup>b\*</sup> Hoang V. Le,<sup>a</sup> Duc N. Ngoc,<sup>a</sup> Quang Duc Truong,<sup>c</sup> Phong D. Tran<sup>a,d\*</sup>

<sup>a</sup>*Department of Advanced Materials Science and Nanotechnology, University of Science and Technology of Hanoi, Vietnam Academy of Science and Technology, 18 Hoang Quoc Viet, Ha Noi, Viet Nam. Email: [tran-dinh.phong@usth.edu.vn](mailto:tran-dinh.phong@usth.edu.vn)*

<sup>b</sup>*School of Chemical Engineering, Hanoi University of Science and Technology, 1 Dai Co Viet road, Ha Noi, Viet Nam. Email: [nguyenthituyetmai87@gmail.com](mailto:nguyenthituyetmai87@gmail.com)*

<sup>c</sup>*Institute of Multidisciplinary Research for Advanced Materials, Tohoku University, Sendai 980-8577, Japan*

<sup>d</sup>*Department of Chemistry, College of Natural Sciences, Hanyang University, Seoul 04763, Republic of Korea. Email: [trandp@hanyang.ac.kr](mailto:trandp@hanyang.ac.kr)*

## Chemicals

Gold chloride trihydrate ( $\text{HAuCl}_4 \cdot 3\text{H}_2\text{O}$ , 99%), terpyridine ( $\text{C}_{15}\text{H}_{11}\text{N}_3$ , 98%), bipyridine ( $\text{C}_{10}\text{H}_8\text{N}_2$ ,  $\geq 98\%$ ), L-cysteine ( $\text{C}_3\text{H}_7\text{NO}_2\text{S}$ ,  $\geq 97\%$ ), methanesulfonic acid ( $\text{CH}_3\text{SO}_3\text{H}$ ,  $\geq 97\%$ ) and trisodium citrate dehydrate ( $\text{Na}_3\text{C}_6\text{H}_5\text{O}_7 \cdot 2\text{H}_2\text{O}$ , 99%) were purchased from Sigma-Aldrich. Hexadecyltrimethyl ammonium bromide ( $\text{C}_{19}\text{H}_{42}\text{BrN}$ ,  $\geq 97\%$ ) were purchased from Merck. All these chemicals were used as received without any purification. Deionized water was used in all the preparations.

## Preparation of colloidal gold nanoparticles (Au-NPs-13nm)

Colloidal gold nanoparticles, having size of 13 nm, were prepared following the method described previously by Turkevich group using trisodium citrate as both reducing agent and surfactant which stabilizes the Au-NPs. 10 mL of  $\text{HAuCl}_4$  aqueous solution ( $2 \cdot 10^{-3}$  M) was heated to  $70^\circ\text{C}$  and 10 mL of aqueous trisodium citrate ( $8 \cdot 10^{-3}$  M) was added to the heated solution with good mechanical stirring. After about a minute a very faint greyish-blue tone appeared gradually darkening over a period of about 5 min. After 45 min, the final color was wine red, which indicated the formation of Au-NPs. The obtained liquid was cooled to room temperature. The final product was isolated by two cycles of centrifugation at 13 000 rpm for 10 min followed by removal of the supernatant.

## Preparation solutions of different surfactants

10 mM solution of different surfactant (*e.g.* bipyridine and terpyridine in dichloromethane and MAS, CTAB, L-cysteine in water) was prepared. To these solutions, a steady  $350\mu\text{g-Au-NPs-13nm/FTO}$  electrode was immersed for 30 min, followed by drying in air.

## **Instrumentation**

The absorption spectra were recorded using a SHIMADZU UV-1280 spectrometer in the 200 to 900 nm range. Scanning electron microscope (SEM) images of the nanostructures were recorded on a Hitachi S4800 microscope. TEM characterizations were performed using a Jeol 100-CX II microscope operating at 100 kV. X-ray diffraction (XRD) spectra of gold nanoparticles were recorded on a Empyrean Diffractometer-Panalytical Monochromatic Cu-K $\alpha$  radiation. The Fourier transform-infrared (FT-IR) spectra were obtained by a Thermo Nicolet iS-10 spectrometer equipped with attenuated total reflection. Infrared spectra were recorded in the range of 4000–500 cm<sup>-1</sup> by 64 scans per spectrum at 4 cm<sup>-1</sup> resolution.

X-ray Photoelectron Spectroscopic (XPS) analysis was conducted using an ESCALAB 220i-XL X-ray photoelectron spectroscopy (XPS) system equipped with a hemispherical analyzer. The background pressure in the analysis chamber was in the 10<sup>-10</sup> Torr range. The analyzer was calibrated with gold, silver, and copper polycrystalline standard samples by setting the Au 4f<sub>7/2</sub>, Ag 3d<sub>5/2</sub> and Cu 2p<sub>3/2</sub> peaks at binding energies of 83.98±0.02, 368.26±0.02, and 932.67±0.02 eV. The survey and high-energy resolution scans were recorded with pass energies of 150 and 20 eV, respectively.

## **H<sub>2</sub>-evolving catalytic activity assay**

All electrochemical measurements were conducted on Metrohm Autolab PG302N potentiostat.

A working electrode was made by drop casting 50  $\mu$ L, 100  $\mu$ L, 150  $\mu$ L, 200  $\mu$ L, 250  $\mu$ L of the catalyst (prepared Au-NPs solutions) to cover a fixed area on fluorine-doped tin oxide coated glass slide (FTO glass) (a circle of 6 mm diameter). Before this step, FTO glass was carefully washed

in ultrasonic bath with acetone, ethanol and then double distilled water. The reference was an Ag/AgCl/KCl electrode. The counter was a glassy carbon rod electrode. The electrolyte was a O<sub>2</sub>-free pH 0 H<sub>2</sub>SO<sub>4</sub> or a phosphate buffer solution. The potential scan rate was 2mV/s. The potential range to scan is between -0.25V and 0.2V (vs. RHE).

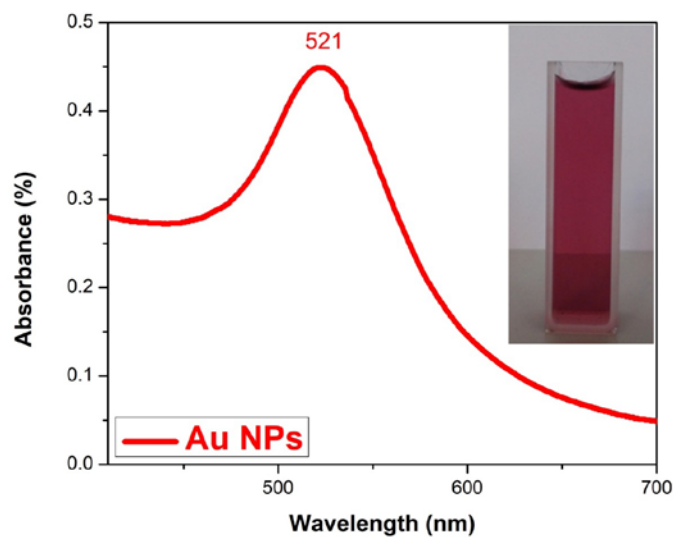

**Figure S1.** Absorption spectrum and digital image (insert) of a synthesized Au-NPs-13nm solution.

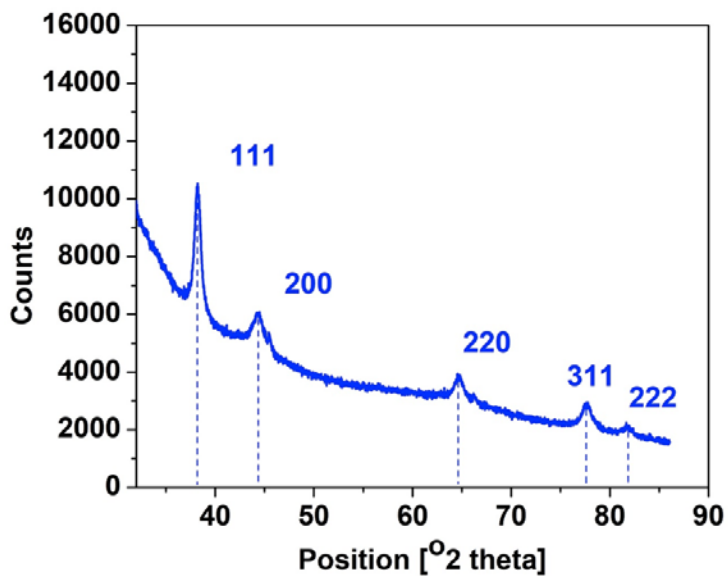

**Figure S2.** XRD pattern of synthesized Au-NPs-13nm.

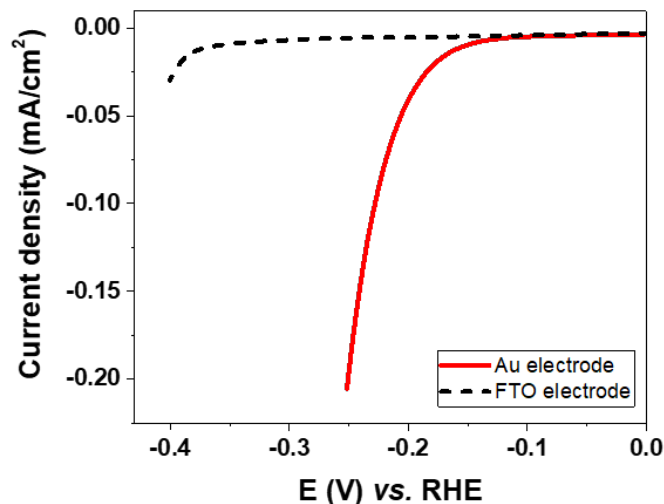

**Figure S3.** Steady I-V curves recorded on a clean FTO (black dashed curve) and a clean Au disk (red curve) electrodes. Electrolyte was a  $O_2$ -free pH 0  $H_2SO_4$  solution. Potential scan rate was 2 mV/s.

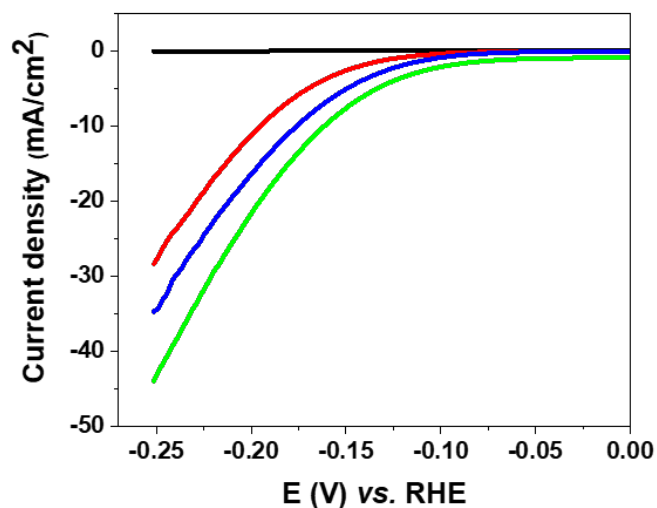

**Figure S4.** Steady I-V curves recorded on a  $350\mu g$ -Au-NPs-13nm coated glassy carbon disk at different angular rotating rate: 0 rpm (red curve), 1000 rpm (blue curve) and 6000 (olive curve). Control I-V curve recorded on the same glassy carbon disk without Au-NPs catalyst loading is also presented (black curve). Electrolyte was a  $O_2$ -free pH 0  $H_2SO_4$  solution. Potential scan rate was 2 mV/s.

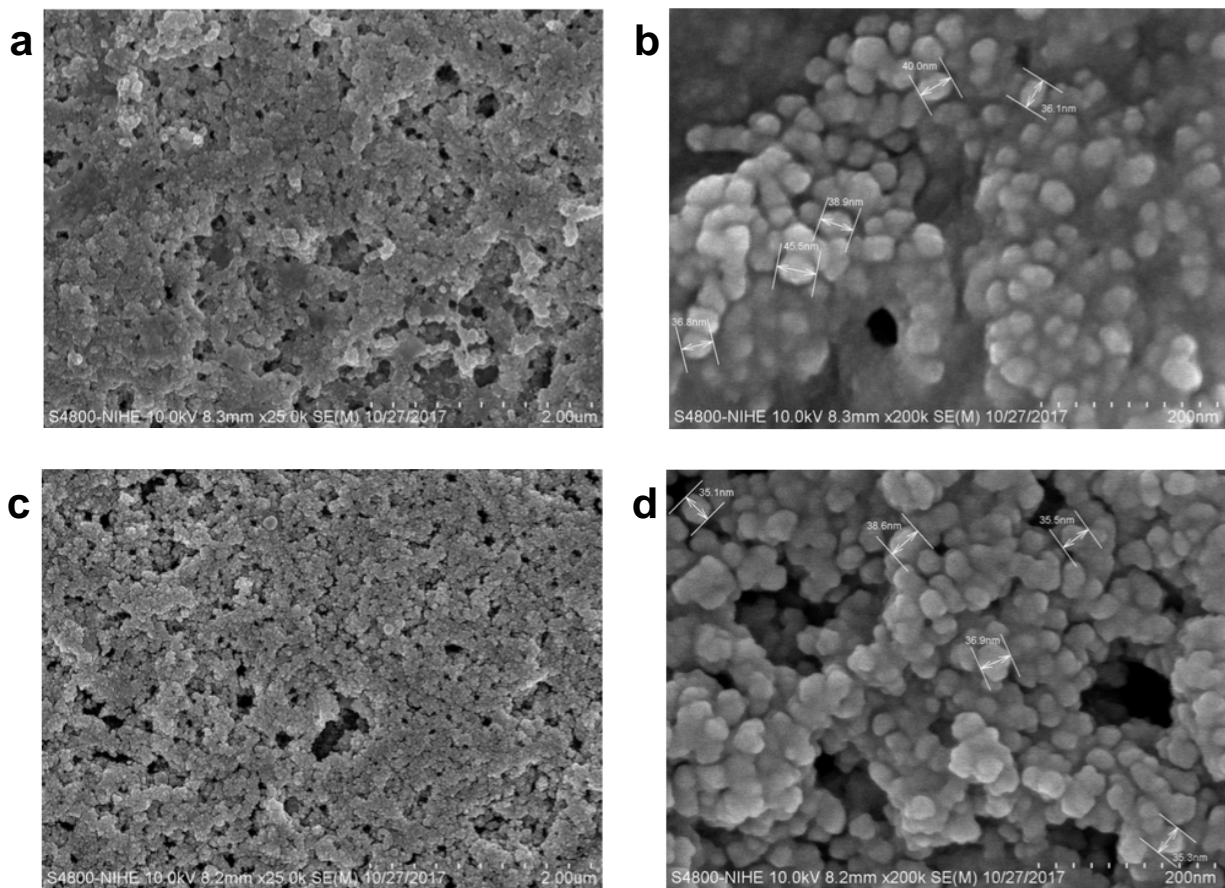

**Figure S5.** SEM images of the as-prepared 70µg-Au-NPs-13nm/FTO electrode (a and b) and the steady 70µg-Au-NPs-13nm/FTO electrode (c and d).

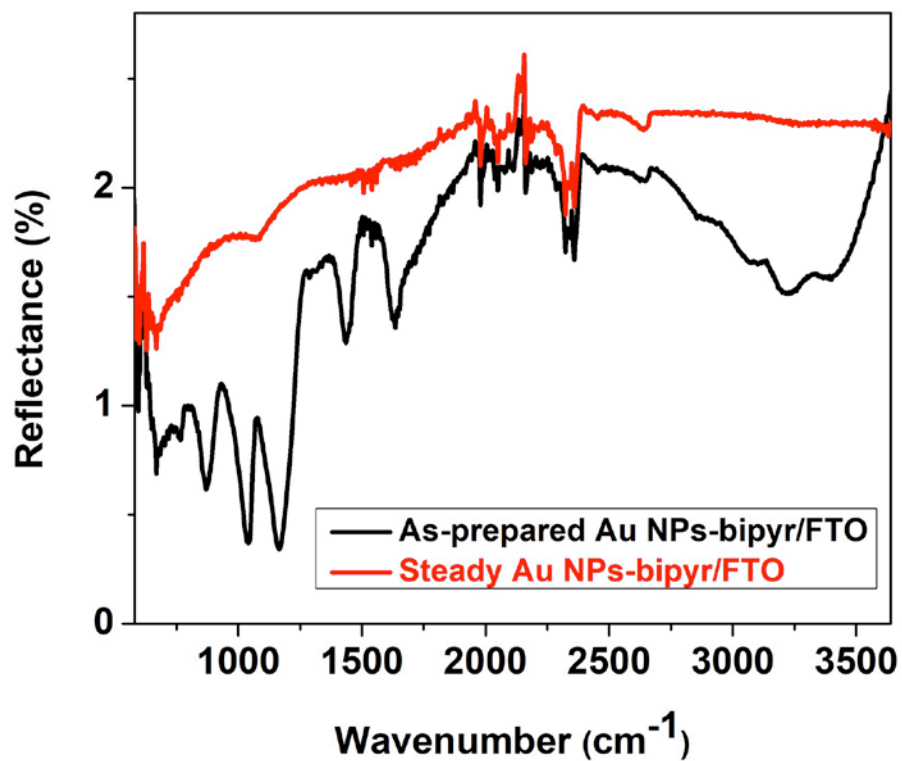

**Figure S6.** ATR-IR spectra of a 350 $\mu$ g-Au-NPs-13nm/FTO electrode immersed in a solution containing bipyridine ligand (black trace) and the same electrode after repeating the cathodic potential polarization (red trace).

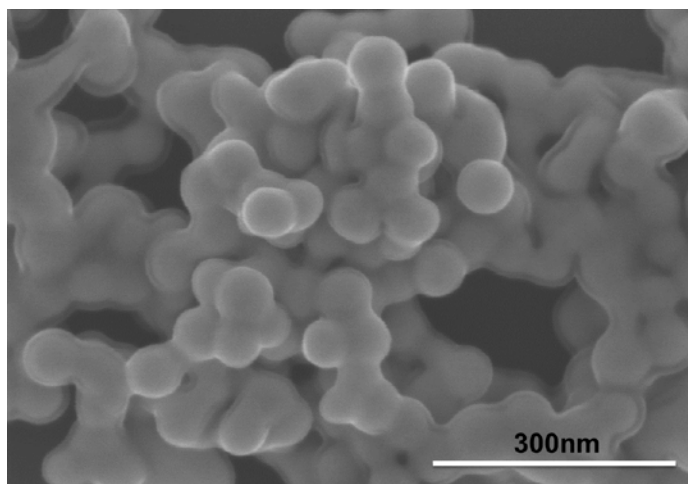

**Figure S7.** SEM image recorded on a 70 $\mu$ g-Au-NPs-60nm/FTO electrode

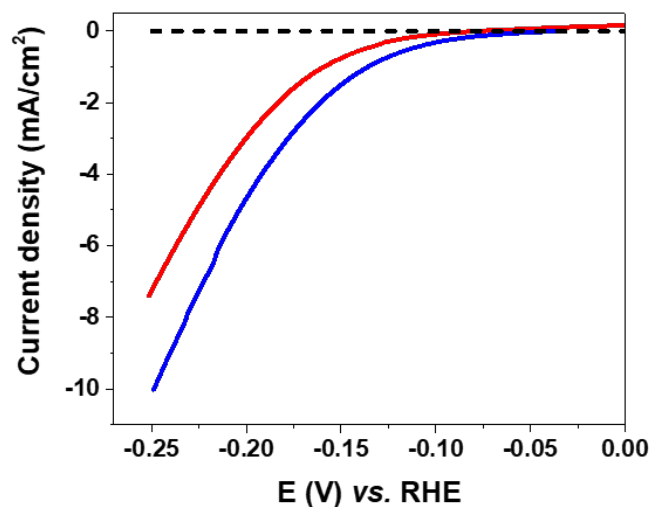

**Figure S8.** Steady I-V curves recorded on a 70µg-Au-NPs-13nm/FTO (blue curve) and a 70µg-Au-NPs-60nm/FTO (red curve) electrodes. Control I-V curve recorded on a clean FTO electrode without Au-NPs catalyst loading is also presented (black dashed curve). Electrolyte was a O<sub>2</sub>-free pH0 H<sub>2</sub>SO<sub>4</sub> solution. Potential scan rate was 2 mV/s.

**Table S1: HER activity of some selected (best) Pt-free catalysts**

| Entry | Catalyst                                            | Onset overpotential<br>$\eta$ (mV) | $\eta$ (mV) at 10 mA/cm <sup>2</sup> | j (mA/cm <sup>2</sup> ) at $\eta$ 200mV | TOFs (s <sup>-1</sup> )                               | Tafel slope (mV/decade) | pH  | Refs |
|-------|-----------------------------------------------------|------------------------------------|--------------------------------------|-----------------------------------------|-------------------------------------------------------|-------------------------|-----|------|
| 1     | Ni <sub>43</sub> Au <sub>57</sub>                   | 70                                 | 160                                  | 17.5                                    | NA                                                    | 43                      | 0   | 1    |
| 2     | MoS <sub>2</sub> /graphene                          | 100                                | 150                                  | 30                                      | NA                                                    | 41                      | 0   | 2    |
| 3     | Strained vacancy MoS <sub>2</sub>                   | 60                                 | 170                                  | 15                                      | 7.5<br>( $\eta$ 100mV)                                | 60                      | 0.2 | 3    |
| 4     | [Mo <sub>3</sub> S <sub>4</sub> ] <sup>4+</sup>     | 150                                | 250                                  | 5                                       | 0.07<br>( $\eta$ 0mV)                                 | 120                     | 0   | 4    |
| 5     | MoS <sub>2</sub> /Au NPs                            | 230                                | 350                                  | -                                       | NA                                                    | 57-66                   | 0   | 5    |
| 6     | [Mo <sub>3</sub> S <sub>13</sub> ] <sup>2-/Au</sup> | 150                                | >300                                 | 0.6                                     | 0.47<br>( $\eta$ 200mV)                               | 58                      | 0   | 6    |
| 7     | [Mo <sub>2</sub> S <sub>12</sub> ] <sup>2-</sup>    | 100                                | 161                                  | 65                                      | 3.27<br>( $\eta$ 200 mV)                              | 39                      | 0   | 7    |
| 8     | [Mo <sub>3</sub> S <sub>13</sub> ] <sup>2-</sup>    | 100-120                            | 180-220                              | 5-27.5                                  | 3<br>( $\eta$ 200mV)                                  | 38-40                   | 0   | 8    |
| 9     | MoS <sub>2</sub> /Au(111)                           |                                    |                                      |                                         | 10<br>( $\eta$ 160mV)                                 |                         |     | 9    |
| 10    | Mo <sub>2</sub> N/C/AuNP (5-8 nm)                   | 200                                | 300                                  | -                                       | NA                                                    | 63                      | 0   | 10   |
| 11    | Au(111)                                             | 130                                | 350                                  | NA                                      | NA                                                    | 60-120                  |     | 11   |
| 12    | Au rods                                             | 280                                | >400                                 | NA                                      | NA                                                    | 105                     | 0   | 12   |
| 13    | Au/MoS <sub>2</sub>                                 | 220                                | 320                                  | NA                                      | NA                                                    | 86                      | 0   | 12   |
| 14    | Au NPs (10 nm)/C                                    | 99-125                             | >350                                 | NA                                      | 4.43.10 <sup>-4</sup><br>( $\eta$ 350 mV)             | 76.6-100.6              | 0   | 13   |
| 15    | Ni <sub>2</sub> P                                   | 30                                 | 100                                  |                                         | 0.015<br>( $\eta$ 100 mV)<br>0.50<br>( $\eta$ 200 mV) | 46                      |     | 14   |
| 16    | CoS <sub>2</sub> NW                                 | 75                                 | 145                                  | NA                                      | NA                                                    | 51.6                    | 0   | 15   |



## References

1. H. Lv, Z. Xi, Z. Chen, S. Guo, Y. Yu, W. Zhu, Q. Li, X. Zhang, M. Pan, G. Lu, S. Mu and S. Sun, *J. Am. Chem. Soc.*, 2015, **137**, 5859-5862
2. Y. Li, H. Wang, L. Xie, Y. Liang, G. Hong and H. Dai, *J. Am. Chem. Soc.*, 2011, **133**, 7296-7299.
3. H. Li, C. Tsai, A. L. Koh, L. Cai, A. W. Contryman, A. H. Fragapane, J. Zhao, H. S. Han, H. C. Manoharan, F. Abild-Pedersen, J. K. Norskov and X. Zheng, *Nat. Mater.*, 2016, **15**, 48-53.
4. T. F. Jaramillo, J. Bonde, J. Zhang, B.-L. Ooi, K. Andersson, J. Ulstrup and I. Chorkendorff, *J. Phys. Chem. C.*, 2008, **112**, 17492-17498.
5. J. Kim, S. Byun, A. J. Smith, J. Yu and J. Huang, *J. Phys. Chem. Lett.*, 2013, **4**, 1227-1232.
6. T. R. Hellstern, J. Kibsgaard, C. Tsai, D. W. Palm, L. A. King, F. Abild-Pedersen and T. F. Jaramillo, *ACS Catal.*, 2017, **7**, 7126-7130.
7. Z. Huang, W. Luo, L. Ma, M. Yu, X. Ren, M. He, S. Polen, K. Click, B. Garrett, J. Lu, K. Amine, C. Hadad, W. Chen, A. Asthagiri and Y. Wu, *Angew. Chem. Int. Ed.*, 2015, **54**, 15181-15185
8. J. Kibsgaard, T. F. Jaramillo and F. Besenbacher, *Nat. Chem.*, 2014, **6**, 248
9. T. F. Jaramillo, K. P. Jorgensen, J. Bonde, J. H. Nielsen, S. Horch, Ib Chorkendorff, *Science*, 2007, **317**, 100-102
10. U. Joshi, J. Lee, C. Giordano, S. Malkhandi and B. S. Yeo, *Phys. Chem. Chem. Phys.*, 2016, **18**, 21548-21553.
11. J. Perez, E. R. Gonzalez and H. M. Villullas, *J. Phys. Chem. B*, 1998, **102**, 10931-10935.
12. Y. Shi, J. Wang, C. Wang, T.-T. Zhai, W.-J. Bao, J.-J. Xu, X.-H. Xia and H.-Y. Chen, *J. Am. Chem. Soc.*, 2015, **137**, 7365-7370.
13. Y. Wang, Y. Sun, H. Liao, S. Sun, S. Li, J. W. Ager and Z. J. Xu, *Electrochimica Acta*, 2016, **209**, 440-447.
14. E. J. Popczun, J. R. McKone, C. G. Read, A. J. Biacchi, A. M. Wiltrout, N. S. Lewis and R. E. Schaak, *J. Am. Chem. Soc.*, 2013, **135**, 9267-9270.
15. M. S. Faber, R. Dzedzic, M. A. Lukowski, N. S. Kaiser, Q. Ding and S. Jin, *J. Am. Chem. Soc.*, 2014, **136**, 10053-10061.
